# Supplementary material
Source: PubMed Central journal article supplement (PMC8079549)
Supplement: NIHMS1673821-supplement-Supplementary_figures_and_tables.pdf [file NIHMS1673821-supplement-Supplementary_figures_and_tables.pdf]

**Supplementary Figure 1: Example of the European Union TPD warning labels adopted by England.**

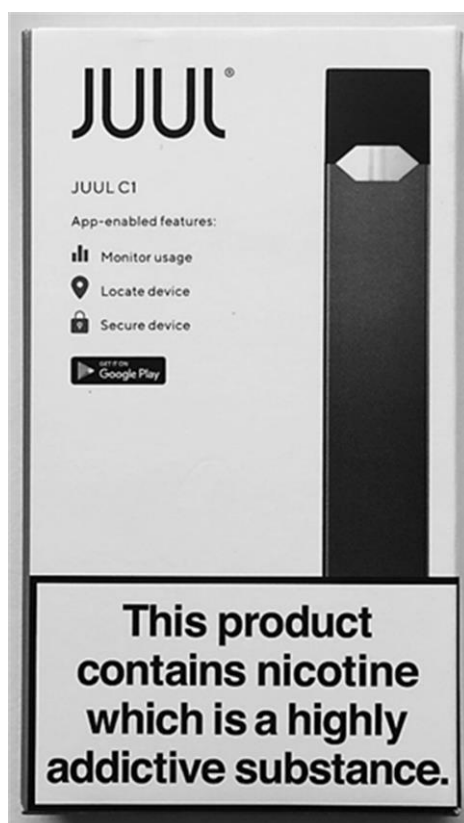

The warning must be in black bold Helvetica type on a white background and cover 30% of the front and the back of the pack.

The EU TPD offered two warning options, ‘*This product contains nicotine which is a highly addictive substance*’ or ‘*This product contains nicotine which is a highly addictive substance. It is not recommended for use by non-smokers*’ England adopted the warning pictured above.

***Supplementary Figure 2: Timeline of policies concerning NVP warnings across England, Canada, the US and Australia***

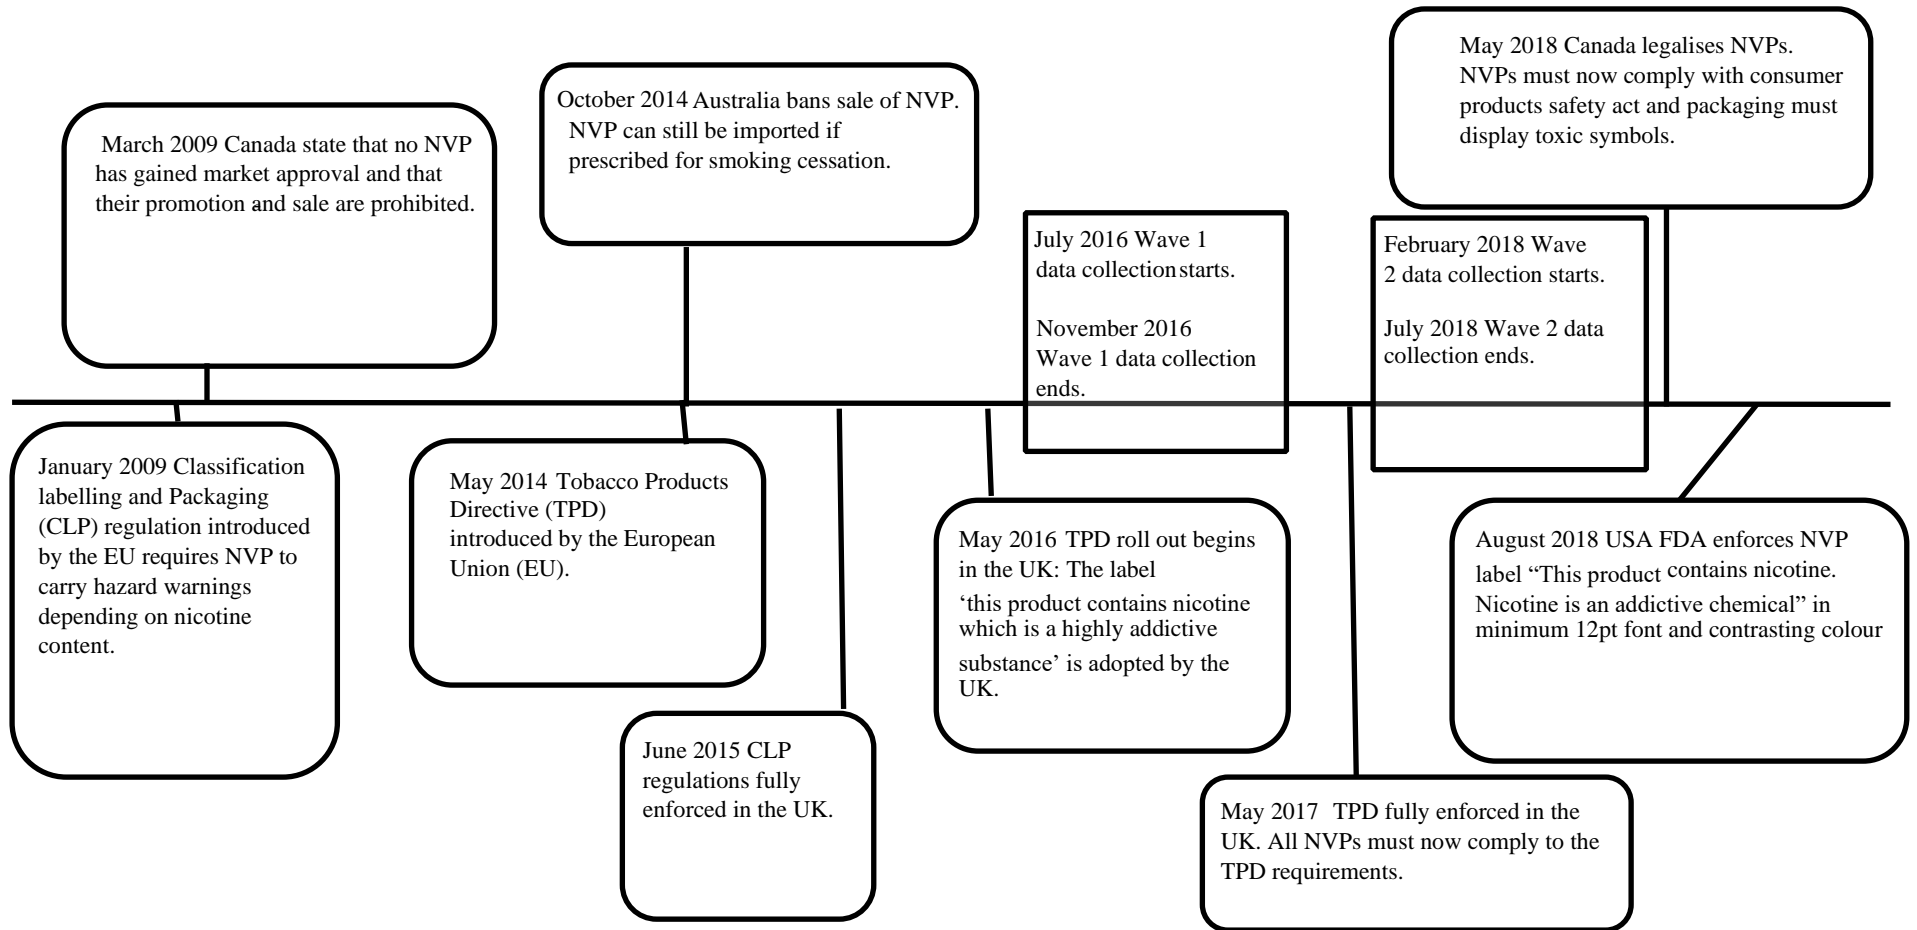

**Supplementary Table 1: Weighted Frequencies of Recalling Warning Messages Across Countries Between Wave 1 (2016) And Wave 2 (2018)**

|                                                                              | England |        | Canada |        | US     |        | Australia |        |
|------------------------------------------------------------------------------|---------|--------|--------|--------|--------|--------|-----------|--------|
|                                                                              | Wave 1  | Wave 2 | Wave 1 | Wave 2 | Wave 1 | Wave 2 | Wave 1    | Wave 2 |
| <b><u>“What do you recall the health warning(s) saying?”</u></b>             |         |        |        |        |        |        |           |        |
| <b>This product contains nicotine which is a highly addictive substance.</b> | 86.0%   | 94.9%  | 79.6%  | 87.0%  | 71.9%  | 88.1%  | 71.1%     | 73.5%  |
| <b>E-cigarettes are not to be used by non-smokers.</b>                       | 29.6%   | 34.7%  | 29.9%  | 31.9%  | 33.7%  | 20.5%  | 25.6%     | 24.9%  |
| <b>Keep e-cigarettes out of reach of children.</b>                           | 70.5%   | 67.6%  | 74.9%  | 78.0%  | 80.4%  | 81.6%  | 58.0%     | 80.6%  |
| <b>E-cigarettes are not a safe alternative to cigarettes.</b>                | 19.7%   | 24.7%  | 40.1%  | 39.9%  | 49.1%  | 45.1%  | 46.5%     | 20.3%  |
| <b>E-cigarettes are not to be sold to minors.</b>                            | 68.5%   | 49.9%  | 64.6%  | 73.4%  | 69.2%  | 72.1%  | 74.7%     | 62.7%  |
| <b>E-cigarettes contain cancer-causing chemicals.</b>                        | 19.4%   | 25.9%  | 51.6%  | 54.4%  | 36.7%  | 41.4%  | 61.4%     | 28.1%  |

All analysis is weighted. Only participants who had reported reading a warning label were included in analysis.

As well as noticing warning labels, respondents were also asked if they read warning labels “In the last 30 days, have you read any of the health warnings”. Those who stated that yes (n=1,521) they had read warnings were asked about recalling a range of warning messages, these are listed in the table above alongside weighted percentages of respondents recalling noticing these warnings.

**Supplementary Table 2: Smoking and Vaping Measures**

| <u>Variable questions</u>                                                                                                                                                                                                                                                                                                                                                                                                                                                                                | <u>Response categories</u>                                                                                                                                                                                                                                                                                                                                                                                                                                                                                                                                                                                                                                                                                                                  |
|----------------------------------------------------------------------------------------------------------------------------------------------------------------------------------------------------------------------------------------------------------------------------------------------------------------------------------------------------------------------------------------------------------------------------------------------------------------------------------------------------------|---------------------------------------------------------------------------------------------------------------------------------------------------------------------------------------------------------------------------------------------------------------------------------------------------------------------------------------------------------------------------------------------------------------------------------------------------------------------------------------------------------------------------------------------------------------------------------------------------------------------------------------------------------------------------------------------------------------------------------------------|
| <p><b>Smoking status</b><br/><i>Derived from the following three questions</i></p> <ul style="list-style-type: none"><li>• Have you smoked 100 or more cigarettes over your lifetime?</li><li>• How often, if at all, do you CURRENTLY smoke ordinary cigarettes (either factory made/packet or roll-your-own)?</li><li>• How long ago did your CURRENT quit attempt start?</li></ul>                                                                                                                    | <p>Respondents were categorised: ‘Daily smoker’, ‘Weekly smoker’, ‘Monthly smoker’, ‘Less than monthly smoker’, ‘Recent quitter (last 24 months)’, ‘Long term quitter’, ‘Never smoked (identifies as never having been a smoker OR smoked less than 100 cigarettes in life time)’. Never smokers were recruited if they were current NVP users.</p>                                                                                                                                                                                                                                                                                                                                                                                         |
| <p><b>Vaping status</b><br/><i>Derived from the following three questions</i></p> <ul style="list-style-type: none"><li>• Have you ever used an e-cigarette or vaping device, even one time?</li><li>• How often, if at all, do you CURRENTLY use e-cigarettes/ vaping devices (i.e. vape)?</li><li>• At the time when you were using e-cigarettes (vaping) most often, how often did you use an e-cigarette?</li></ul>                                                                                  | <p>Respondents were categorised: ‘Current daily vaper’, ‘Current weekly vaper’, ‘Current monthly vaper’, ‘Current less-than-monthly vaper’, ‘Quitter (past vaper at least weekly)’, ‘Past trier (vaped more than once/ occasionally)’ ‘Past trier (vaped only once)’.</p>                                                                                                                                                                                                                                                                                                                                                                                                                                                                   |
| <p><b>Smoking and vaping status (<i>all groups mutually exclusive</i>)</b><br/>This variable was derived from the above Smoking and Vaping status variables.</p>                                                                                                                                                                                                                                                                                                                                         | <p>Responses were categorised:</p> <p><b>Concurrent:</b> Any current (daily, weekly, monthly, less than monthly) smoking AND any current (daily, weekly, monthly, less-than monthly) NVP use.</p> <p><b>Daily NVP:</b> ‘Current daily vaper’.</p> <p><b>Non-Daily NVP:</b> ‘Current weekly vaper’, ‘Current monthly vaper’, ‘Current less-than-monthly vaper’.</p> <p><b>Daily smoker:</b> ‘Daily smoker’.</p> <p><b>Non-Daily smoker:</b> ‘Weekly smoker’, ‘Monthly smoker’, ‘Less than monthly smoker’.</p> <p><b>Quitter:</b> ‘Quitter (past vaper at least weekly)’, ‘Past trier (vaped more than once/ occasionally)’ ‘Past trier (vaped only once)’ OR ‘Recent quitter -last 24 months (smoking)’, ‘Long term quitter (smoking)’.</p> |
| <p><b>Friend or family uses an NVP</b><br/><i>Derived from the following three questions:</i></p> <ul style="list-style-type: none"><li>• “Does your partner or spouse currently use e-cigarettes/ vaping devices?”</li><li>• “How many people 18 or over in your household currently use e-cigarettes/ vaping devices at least weekly?”</li><li>• “Of the 5 closest friends or acquaintances that you spend time with on a regular basis, how many of them use e-cigarettes/ vaping devices?”</li></ul> | <p>Responses were categorised:</p> <p><b>Yes:</b> ‘Yes’ response to partner or spouse using an e-cigarette OR reporting 1 or more people in their household using an e-cigarette OR reporting 1 or more friends using an e-cigarette.</p> <p><b>No:</b> no friends/family use e-cigarettes or ‘refused’ or ‘don’t know’ responses to all three questions.</p>                                                                                                                                                                                                                                                                                                                                                                               |

**Supplementary Table 3: Unweighted Participant Characteristics at Wave 1 and Wave 2 (2016-2018) by Country.**

|                                  | <u>England</u>       |                      | <u>Canada</u>        |                      | <u>US</u>            |                      | <u>Australia</u>     |                      |
|----------------------------------|----------------------|----------------------|----------------------|----------------------|----------------------|----------------------|----------------------|----------------------|
|                                  | Wave 1 %<br>(N=4146) | Wave 2 %<br>(N=4609) | Wave 1 %<br>(N=3630) | Wave 2 %<br>(N=3669) | Wave 1 %<br>(N=2685) | Wave 2 %<br>(N=2810) | Wave 1 %<br>(N=1473) | Wave 2 %<br>(N=1490) |
| <u>Gender</u>                    |                      |                      |                      |                      |                      |                      |                      |                      |
| Male                             | 53.5%                | 50.1%                | 46.9%                | 47.2%                | 51.7%                | 46.3%                | 51.3%                | 51.5%                |
| Female                           | 46.5%                | 49.9%                | 53.1%                | 52.8%                | 48.3%                | 53.7%                | 48.7%                | 48.5%                |
| <u>Age</u>                       |                      |                      |                      |                      |                      |                      |                      |                      |
| 18-24                            | 21.2%                | 23.3%                | 23.6%                | 23.6%                | 19.4%                | 22.7%                | 3.1%                 | 1.9%                 |
| 25-39                            | 25.2%                | 22.2%                | 25.3%                | 25.5%                | 26.8%                | 17.8%                | 19.2%                | 16.6%                |
| 40-54                            | 26.4%                | 25.9%                | 27.6%                | 27.4%                | 17.5%                | 20.9%                | 38.5%                | 35.0%                |
| 55 +                             | 27.3%                | 28.6%                | 23.5%                | 23.5%                | 36.3%                | 38.6%                | 39.2%                | 46.5%                |
| <u>Ethnicity<sup>a</sup></u>     |                      |                      |                      |                      |                      |                      |                      |                      |
| White                            | 93.1%                | 92.1%                | 81.8%                | 79.7%                | 78.1%                | 75.7%                | 89.1%                | 90.8%                |
| Non-White                        | 6.9%                 | 7.9%                 | 18.2%                | 20.3%                | 21.9%                | 24.3%                | 10.9%                | 9.2%                 |
| <u>Income<sup>b</sup></u>        |                      |                      |                      |                      |                      |                      |                      |                      |
| Low                              | 20.9%                | 23.3%                | 22.3%                | 22.3%                | 31.1%                | 35.2%                | 20.2%                | 22.6%                |
| Moderate                         | 29.0%                | 30.3%                | 28.2%                | 28.5%                | 29%                  | 29.6%                | 24.7%                | 24.5%                |
| High                             | 42.3%                | 40.4%                | 42.5%                | 42.1%                | 39.0%                | 34.6%                | 48.4%                | 46.6%                |
| No Answer                        | 7.7%                 | 6.0%                 | 7.0%                 | 7.1%                 | 0.9%                 | 0.5%                 | 6.7%                 | 6.3%                 |
| <u>Education<sup>c</sup></u>     |                      |                      |                      |                      |                      |                      |                      |                      |
| Low                              | 28.1%                | 30.3%                | 29.2%                | 28.6%                | 31.3%                | 35.5%                | 33.1%                | 34.0%                |
| Moderate                         | 40.8%                | 40.6%                | 44.7%                | 43.8%                | 37.2%                | 43.5%                | 40.1%                | 40.7%                |
| High                             | 31.1%                | 29.1%                | 26.0%                | 27.6%                | 31.5%                | 21.0%                | 26.8%                | 25.3%                |
| <u>Friend/family Vape</u>        |                      |                      |                      |                      |                      |                      |                      |                      |
| Yes                              | 34.6%                | 38.1%                | 33.8%                | 34.5%                | 34.1%                | 31.7%                | 14.0%                | 18.3%                |
| No                               | 65.4%                | 61.9%                | 66.2%                | 65.5%                | 65.9%                | 68.3%                | 86.0%                | 81.7%                |
| <u>Wave of recruitment</u>       |                      |                      |                      |                      |                      |                      |                      |                      |
| Wave 1                           | n/a                  | 66.5%                | n/a                  | 74.6%                | n/a                  | 70.5%                | n/a                  | 78.2%                |
| Wave 2                           | n/a                  | 33.5%                | n/a                  | 25.4%                | n/a                  | 29.5%                | n/a                  | 21.8%                |
| <u>Smoking and Vaping Status</u> |                      |                      |                      |                      |                      |                      |                      |                      |
| Concurrent                       | 47.0%                | 50.1%                | 49.3%                | 43.2%                | 46.7%                | 36.7%                | 23.4%                | 22.8%                |
| Daily EC                         | 3.8%                 | 6.7%                 | 2.4%                 | 3.4%                 | 4.9%                 | 10.3%                | 2.6%                 | 5.1%                 |
| Non-Daily EC                     | 1.5%                 | 1.5%                 | 3.9%                 | 5.4%                 | 1.5%                 | 2.6%                 | 0.7%                 | 0.9%                 |
| Daily Smoker                     | 33.2%                | 32.3%                | 27.3%                | 29.7%                | 32.5%                | 33.5%                | 61.0%                | 56.6%                |
| Non-Daily Smoker                 | 9.6%                 | 4.9%                 | 9.4%                 | 5.7%                 | 6.2%                 | 5%                   | 4.8%                 | 3.4%                 |
| Quitter                          | 4.8%                 | 4.5%                 | 7.8%                 | 12.7%                | 8.3%                 | 11.9%                | 7.5%                 | 11.3%                |

Percentages are based on unweighted data.

<sup>a</sup> 'White' included participants who identified as white for US, Canada and England, and -English speaking for Australia. 'Non-White' included participants who identified as a different ethnicity in the US, Canada, and England or were non-English speaking in Australia.

<sup>b</sup> Income was derived from reported yearly household income. Low included those with a household income of up to £15,000 or \$29,999 (CA, US and AU). Moderate included those with a household income of £15,001-£30,000 or \$30,000-\$59,999 (CA, US, AU). High included those with a household income of over £30,001 or \$60,000 (CA, US, AU).

<sup>c</sup> Education was derived from reported highest level of education. Low included those with primary or secondary school education. Moderate included those with further training/ college qualifications or those who had not completed university. High included those who had completed a university degree.

**Supplementary Table 4: Correlates of Noticing Health Warning Labels at Wave 1(2016, N=11934) and Wave 2(2018, N=12578)**

|                                  |                  | Noticing HWLs Wave 1 (2016) |       |      |        |       | Noticing HWLs Wave 2 (2018) |     |       |       |        |       |       |
|----------------------------------|------------------|-----------------------------|-------|------|--------|-------|-----------------------------|-----|-------|-------|--------|-------|-------|
|                                  |                  | n                           | %     | OR   | 95% CI |       | p                           | n   | %     | OR    | 95% CI |       | p     |
| <b>Total</b>                     |                  | 685                         | 5.8 % |      |        |       |                             | 870 | 6.9 % |       |        |       |       |
| <b>Country</b>                   | Canada           | 254                         | 7.0%  | 1.58 | 1.17   | 2.13  | <.001                       | 188 | 5.1%  | 0.74  | 0.57   | 0.95  | .018  |
|                                  | US               | 188                         | 7.0%  | 1.83 | 1.29   | 2.59  | <.001                       | 180 | 6.5%  | 0.86  | 0.66   | 1.13  | .288  |
|                                  | Australia        | 39                          | 2.7%  | 0.89 | 0.56   | 1.43  | .640                        | 71  | 4.8%  | 0.53  | 0.36   | 0.89  | .013  |
|                                  | England          | 201                         | 4.9%  | ref  |        |       |                             | 430 | 9.4%  | ref   |        |       |       |
| <b>Age</b>                       | 18-24            | 142                         | 9.0%  | 1.53 | 1.06   | 2.21  | .020                        | 202 | 14.0% | 1.35  | 0.80   | 2.28  | <.001 |
|                                  | 25-39            | 254                         | 6.6%  | 1.29 | 0.94   | 1.77  | .110                        | 366 | 8.7%  | 1.07  | 0.66   | 1.75  | .001  |
|                                  | 40-54            | 149                         | 4.4%  | 0.90 | 0.64   | 1.25  | .520                        | 179 | 5.1%  | 1.00  | 0.61   | 1.63  | .147  |
|                                  | 55+              | 138                         | 4.5%  | ref  |        |       |                             | 123 | 3.6%  | ref   |        |       |       |
| <b>Gender</b>                    | Male             | 460                         | 7.0%  | 1.77 | 1.40   | 2.22  | <.001                       | 509 | 7.3%  | 1.26  | 1.01   | 1.58  | .042  |
|                                  | Female           | 223                         | 4.2%  | ref  |        |       |                             | 361 | 6.4%  | ref   |        |       |       |
| <b>Ethnicity<sup>a</sup></b>     | White            | 524                         | 5.1%  | 0.61 | 0.45   | 0.81  | <.001                       | 687 | 6.3%  | 0.64  | 0.48   | 0.85  | .002  |
|                                  | Non-White        | 159                         | 10.3% | ref  |        |       |                             | 183 | 10.5% | ref   |        |       |       |
| <b>Income<sup>b</sup></b>        | Low              | 164                         | 6.0%  | 1.34 | 0.75   | 2.40  | .320                        | 228 | 7.7%  | 1.36  | 0.81   | 2.29  | .251  |
|                                  | Moderate         | 218                         | 6.5%  | 1.46 | 0.84   | 2.53  | .180                        | 231 | 6.4%  | 1.08  | 0.66   | 1.76  | .767  |
|                                  | High             | 270                         | 5.4%  | 1.09 | 0.64   | 1.85  | .740                        | 363 | 6.9%  | 1.01  | 0.62   | 1.65  | .964  |
|                                  | No Answer        | 30                          | 4.0%  | ref  |        |       |                             | 48  | 7.0%  | ref   |        |       |       |
| <b>Education<sup>c</sup></b>     | Low              | 168                         | 4.6%  | 0.65 | 0.49   | 0.87  | <.001                       | 214 | 5.7%  | 0.81  | 0.60   | 2.29  | .197  |
|                                  | Moderate         | 341                         | 5.8%  | 0.84 | 0.66   | 1.07  | .160                        | 436 | 7.3%  | .77   | 0.58   | 1.101 | .063  |
|                                  | High             | 174                         | 7.2%  | ref  |        |       |                             | 220 | 7.8%  | ref   |        |       |       |
| <b>Friend/Family Vape</b>        | Yes              | 312                         | 10.2% | 1.73 | 1.36   | 2.21  | <.001                       | 519 | 14.8% | 2.15  | 1.72   | 2.68  | <.001 |
|                                  | No               | 370                         | 4.3%  | ref  |        |       |                             | 350 | 3.9%  | ref   |        |       |       |
| <b>Smoking and vaping status</b> | Concurrent       | 299                         | 9.7%  | 3.49 | 1.81   | 6.73  | <.001                       | 328 | 11.5% | 7.34  | 3.58   | 15.29 | <.001 |
|                                  | Daily NVP        | 107                         | 17.4% | 7.47 | 3.55   | 15.70 | <.001                       | 315 | 37.0% | 32.07 | 14.98  | 68.75 | <.001 |
|                                  | Non-daily NVP    | 49                          | 8.8%  | 2.80 | 1.25   | 6.24  | .010                        | 55  | 10.5% | 5.09  | 2.11   | 12.26 | <.001 |
|                                  | Daily smoker     | 110                         | 2.7%  | 1.15 | 0.59   | 2.24  | .68                         | 106 | 2.2%  | 1.80  | 0.83   | 3.87  | .135  |
|                                  | Non-daily smoker | 55                          | 5.4%  | 2.06 | 1.01   | 4.19  | .05                         | 36  | 4.8%  | 3.44  | 1.45   | 8.15  | .005  |
|                                  | Quitter          | 63                          | 2.5%  | ref  |        |       |                             | 30  | 1.2%  | ref   |        |       |       |

Analysis used weighted logistic regression and was completed for Wave 1(2016) and Wave 2 (2018) separately. Percentages and regressions are based on weighted data. Noticed warning responses only includes responders who stated they had noticed warnings

<sup>a</sup> 'White' included participants who identified as white for US, Canada and England, and English speaking for Australia. 'Non-White' included participants who identified as a different ethnicity in the US, Canada, and England or were non-English speaking in Australia.

<sup>b</sup> Income was derived from reported yearly household income. Low included those with a household income of up to £15,000 or \$29,999 (CA, US and AU). Moderate included those with a household income of £15,001-£30,000 or \$30,000-\$59,999 (CA, US, AU). High included those with a household income of over £30,001 or \$60,000 (CA, US, AU).

<sup>c</sup> Education was derived from reported highest level of education. Low included those with primary or secondary school education. Moderate included those with further training/ college qualifications or those who had not completed university. High included those who had completed a university degree.
